# Supplementary material for: Follow-Up Magnetic Resonance Imaging of Sagittal Groove Disease of the Equine Proximal Phalanx Using a Classification System in 29 Non-Racing Sports Horses
Source: MDPI journal article supplement (doi:10.3390/ani14010034), 2023-12-21
Supplement: s1 [file s1]

## Supplementary file S1:

### Fetlock MRI acquisition protocols used in 33 limbs diagnosed with sagittal groove disease (SGD) of the proximal phalanx (PP)

#### Materials and methods

The typical acquisition protocol for a fetlock with SGD using an open 0.27T permanent magnetic resonance system (Hallmarq EQ2, Guildford, UK) would include:

- T1 GRE/ T2 GRE / STIR FSE FRO oriented on the PP
- T1 GRE/ STIR FSE SAG
- T1 GRE/ T2 FSE/ T2 GRE / STIR FSE TRA oriented on the condyle, with additional sequences oriented on the PP if lesion extent not clear.
- All slice thickness 5mm, with additional 'HR FAST' with slice thickness 3,5mm if lesion not detailed enough.
- Motion correction techniques selected based on the level of cooperation of the patients. FAST (2 experiments) attempted first, sometimes SFAST (1 experiment) if too much motion.

#### Results

Figure: Bar chart showing MRI sequences performed during sequential examination of 33 fetlocks with sagittal groove disease, displayed as percentages of limbs per exam

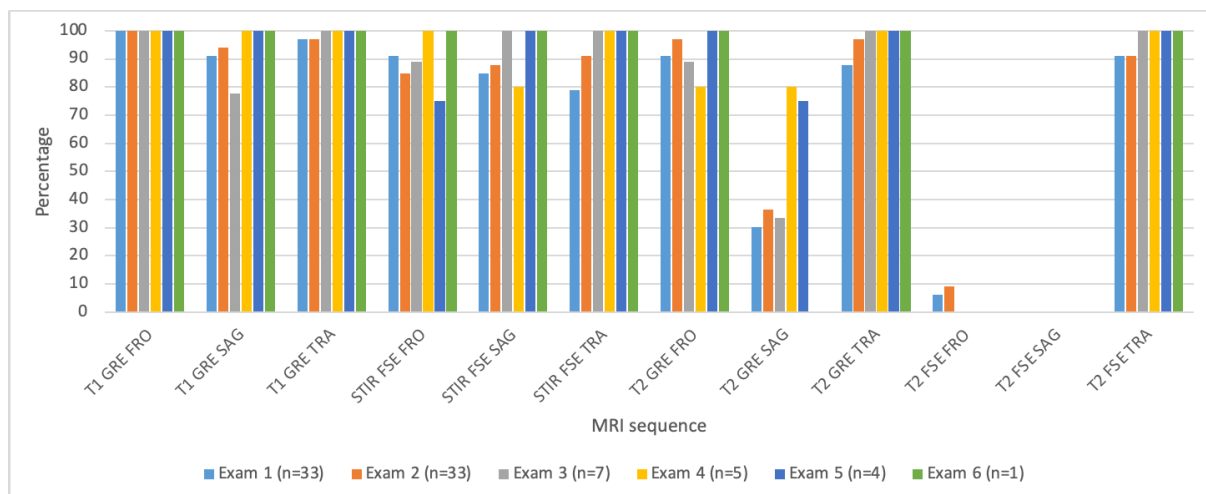

#### Notes

T1 GRE, T1-weighted gradient recalled echo ; STIR FSE, short tau inversion recovery fast spin echo; T2 GRE, T2-weighted out of phase gradient recalled echo (T2\*oW); T2 FSE, T2-weighted fast spin echo; FRO, dorsal ('frontal') plane; SAG, sagittal plane; TRA, transverse plane.
