# Supplementary material for: Follow-Up Magnetic Resonance Imaging of Sagittal Groove Disease of the Equine Proximal Phalanx Using a Classification System in 29 Non-Racing Sports Horses
Source: MDPI journal article supplement (doi:10.3390/ani14010034), 2023-12-21
Supplement: s1 [file s1]

## Supplementary file S2:

### Visual guide to MRI semi-quantitative grading scheme for sagittal groove disease of the proximal phalanx

| <b>Proximal phalanx: sagittal groove</b>                                                                                               |                                         | 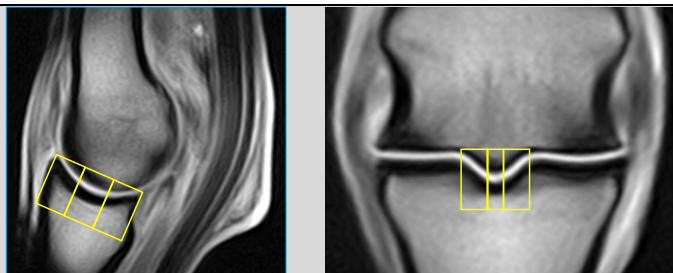                                                                                                                                                                                                                                                                                                                                                                                                                                                                                                                                                                                                                                                    |                                                                                                                  |                                                                                                                                                                                                |                                                                                                                                                                                    |                                                                                                                                                                                   |
|----------------------------------------------------------------------------------------------------------------------------------------|-----------------------------------------|----------------------------------------------------------------------------------------------------------------------------------------------------------------------------------------------------------------------------------------------------------------------------------------------------------------------------------------------------------------------------------------------------------------------------------------------------------------------------------------------------------------------------------------------------------------------------------------------------------------------------------------------------------------------------------------------------------------------------------------|------------------------------------------------------------------------------------------------------------------|------------------------------------------------------------------------------------------------------------------------------------------------------------------------------------------------|------------------------------------------------------------------------------------------------------------------------------------------------------------------------------------|-----------------------------------------------------------------------------------------------------------------------------------------------------------------------------------|
| 3 subregions - dorsal, middle and palmar/plantar thirds                                                                                |                                         |                                                                                                                                                                                                                                                                                                                                                                                                                                                                                                                                                                                                                                                                                                                                        |                                                                                                                  |                                                                                                                                                                                                |                                                                                                                                                                                    |                                                                                                                                                                                   |
| Locations categorised as lateral sloping parasagittal zone, mid-sagittal zone and medial sloping parasagittal zone                     |                                         |                                                                                                                                                                                                                                                                                                                                                                                                                                                                                                                                                                                                                                                                                                                                        |                                                                                                                  |                                                                                                                                                                                                |                                                                                                                                                                                    |                                                                                                                                                                                   |
| Criteria                                                                                                                               | Description                             | Grading                                                                                                                                                                                                                                                                                                                                                                                                                                                                                                                                                                                                                                                                                                                                |                                                                                                                  |                                                                                                                                                                                                |                                                                                                                                                                                    |                                                                                                                                                                                   |
| Subchondral bone defects                                                                                                               | An interruption of the subchondral bone | 0 = Absent<br><br>Smooth and regular chondro-osseous junction                                                                                                                                                                                                                                                                                                                                                                                                                                                                                                                                                                                                                                                                          | 1 = Minor indentation or irregularity of the chondro-osseous junction<br><br>Shallow and/or visible in one slice | 2 = Microfissure (≤ 3mm length)<br><br>Proximodistally-oriented, narrow, linearity extending from the chondro-osseous junction and not exiting the distal aspect of the subchondral bone plate | 3 = Short macrofissure (>3mm and <15mm length)<br><br>Proximodistally-oriented, narrow, linear defect extending through the (thickened) subchondral bone plate and trabecular bone | 4 = Long macrofissure/fracture (≥15mm length)<br><br>Proximodistally-oriented, narrow, linear defect extending through the (thickened) subchondral bone plate and trabecular bone |
|                                                                                                                                        |                                         |                                                                                                                                                                                                                                                                                                                                                                                                                                                                                                                                                                                                                                                      |                              |                                                                                                            |                                                                                                |                                                                                               |
|                                                                                                                                        |                                         | Location categorised as: Mid-sagittal with proximodistal orientation, originating at the lateral margin of the mid-sagittal zone and/or with a distolateral oblique component, originating at the medial margin of the mid-sagittal zone and/or with a distomedial oblique component, lateral parasagittal, medial parasagittal.<br><br>Configuration categorised as: Unipartite (singular lesion), tripartite (three parallel dorsopalmarly/plantarly ± proximodistally oriented lines, typically two hyperintense lines flanking a hypointense line, similar to the “chromosome-like” appearance as described on CT [1]).<br><br>Examples shown (L to R) of mid-sagittal (unipartite), mid-sagittal (tripartite), oblique component. |                                                                                                                  |                                                                                                                                                                                                |                                                                                                                                                                                    |                                                                                                                                                                                   |
| Size measured (proximodistal x dorsopalmar/plantar x mediolateral) (mm) on T1 GRE sequences where possible, values <1mm entered as 1mm |                                         |                                                                                                                                                                                                                                                                                                                                                                                                                                                                                                                                                                                                                                                                                                                                        |                                                                                                                  |                                                                                                                                                                                                |                                                                                                                                                                                    |                                                                                                                                                                                   |

|                                                                                                                    |                                                                                                                                                                                   |                                                                                                         |                                                                                       |                                                                                                                                                          |                                                                                                                                                                   |                                                                                                                                                                       |
|--------------------------------------------------------------------------------------------------------------------|-----------------------------------------------------------------------------------------------------------------------------------------------------------------------------------|---------------------------------------------------------------------------------------------------------|---------------------------------------------------------------------------------------|----------------------------------------------------------------------------------------------------------------------------------------------------------|-------------------------------------------------------------------------------------------------------------------------------------------------------------------|-----------------------------------------------------------------------------------------------------------------------------------------------------------------------|
| Subchondral demineralisation                                                                                       | Regions within the subchondral bone plate which are hyperintense on all sequences                                                                                                 | 0 = Absent                                                                                              | 1 = Unipartite<br><br>Single site                                                     | 2 = Tripartite/ "chromosome-like" [1]<br><br>Two hyperintensities separated by hypointensity                                                             | * Suspected osseous cyst-like lesions included in category and noted<br><br>Well defined osseous defect with sclerotic rim, suspected fluid or gelatinous content | * Proximodistally-oriented hyperintense linearities not counted as demineralisation (-> categorised as fissure – grade 2, 3 or 4 subchondral bone defects, see above) |
|                                                                                                                    |                                                                                                                                                                                   |                        |    |                                                                       |                                                                                                                                                                   |                                                                                                                                                                       |
|                                                                                                                    | Location recorded as maximal point: mid-sagittal, medial or lateral parasagittal                                                                                                  |                                                                                                         |                                                                                       |                                                                                                                                                          |                                                                                                                                                                   |                                                                                                                                                                       |
| Size of demineralised region (proximodistal x dorsopalmar/plantar x mediolateral)(mm) measured on T1 GRE sequences |                                                                                                                                                                                   |                                                                                                         |                                                                                       |                                                                                                                                                          |                                                                                                                                                                   |                                                                                                                                                                       |
| Osseous densification                                                                                              | Abnormal low signal intensity of the subchondral and/or trabecular bone on T1 GRE and T2 FSE<br><br>Extent visually estimated using proximodistal distance from articular surface | 0 = Normal subchondral bone plate thickness and transition to trabecular bone ( $\pm \leq 3\text{mm}$ ) | 1 = Hypointense signal increased, distance less than the depth of the sagittal groove | 2 = Hypointense signal increased, distance greater than one times the depth of the sagittal groove and extending no further than the physis/physeal scar | 3 = Hypointense signal increased, extending further distally than the physis/ physeal scar and into the diaphysis                                                 |                                                                                                                                                                       |
|                                                                                                                    |                                                                                                                                                                                   |                       |   |                                                                      |                                                                               |                                                                                                                                                                       |
|                                                                                                                    | Location of the densification recorded as centred: mid-sagittally (biaxially symmetrical), medially or laterally                                                                  |                                                                                                         |                                                                                       |                                                                                                                                                          |                                                                                                                                                                   |                                                                                                                                                                       |

|                                                                                                     |                                                                                                                                                                                                                                                              |                                                                                                                                                                                                                                                                                   |                                                                                                                                                                                                                                                                                               |                                                                                                                                                       |                                                                                                            |                                                                                                            |
|-----------------------------------------------------------------------------------------------------|--------------------------------------------------------------------------------------------------------------------------------------------------------------------------------------------------------------------------------------------------------------|-----------------------------------------------------------------------------------------------------------------------------------------------------------------------------------------------------------------------------------------------------------------------------------|-----------------------------------------------------------------------------------------------------------------------------------------------------------------------------------------------------------------------------------------------------------------------------------------------|-------------------------------------------------------------------------------------------------------------------------------------------------------|------------------------------------------------------------------------------------------------------------|------------------------------------------------------------------------------------------------------------|
| Bone oedema-like signal                                                                             | T1 GRE hypointensity, STIR FSE hyperintensity, intermediate or increased intensity on T2 GRE (T2*oW) with rim of hypointensity (fat water cancellation phenomenon, FWC)<br><br>Extent visually estimated using proximodistal distance from articular surface | 0 = Absence of relevant bone oedema-like signal<br><br>No clear STIR hyperintensity; T2* hyperintense foci or thin line within the subchondral bone plate which parallel the anatomical contour of the articular surface are not considered relevant and therefore may be present | 1 = Abnormal signal involving only the subchondral bone plate.<br><br>STIR hyperintensity may be present (not always visualised due to artefacts or concurrent osseous densification); larger or thicker region of hyperintense or intermediate T2* signal, with clear rim of hypointense FWC | 2 = Abnormal signal involving the subchondral bone plate and extending into the trabecular bone, up to the level of the proximal physis/ physeal scar | 3 = Abnormal signal involving the subchondral bone plate and extending into the diaphyseal trabecular bone | 4 = Abnormal signal extending into the diaphyseal trabecular bone, with distally directed linear extension |
|                                                                                                     | 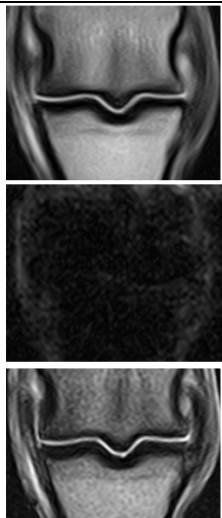                                                                                                                                                                           |                                                                                                                                                                                               |                                                                                                                                                                                                           |                                                                   |                        |                                                                                                            |
| Location of bone oedema-like signal recorded as being centred mid-sagittally, medially or laterally |                                                                                                                                                                                                                                                              |                                                                                                                                                                                                                                                                                   |                                                                                                                                                                                                                                                                                               |                                                                                                                                                       |                                                                                                            |                                                                                                            |

#### References

1. Brünisholz, H.P.; Hagen, R.; Fürst, A.E.; Kuemmerle, J.M. Radiographic and Computed Tomographic Configuration of Incomplete Proximal Fractures of the Proximal Phalanx in Horses Not Used for Racing. *Veterinary Surgery* 2015, 44, 809–815, doi:10.1111/vsu.12364.
